# Supplementary material for: Characterization of Rat Cardiovascular System by Anacrotic/Dicrotic Notches in the Condition of Increase/Decrease of NO Bioavailability
Source: Int J Mol Sci. 2020 Sep 12;21(18):6685. doi: 10.3390/ijms21186685 (PMC7555952; doi:10.3390/ijms21186685)
Supplement: Supplementary file 1 [file ijms-21-06685-s001.pdf]

## Supplementary Materials

To

# Characterization of rat cardiovascular system by anacrotic/dicrotic notches in the condition of increase/decrease of NO bioavailability

Lenka Tomasova <sup>1</sup>, Anton Misak <sup>1</sup>, Lucia Kurakova <sup>1,2</sup>, Marian Grman <sup>1</sup> and Karol Ondrias <sup>1,\*</sup>

<sup>1</sup> Institute of Clinical and Translational Research, Biomedical Research Center, Slovak Academy of Sciences, Dubravská cesta 9, 845 05 Bratislava, Slovak Republic; [lenka.tomasova@savba.sk](mailto:lenka.tomasova@savba.sk) (L.T.); [anton.misak@savba.sk](mailto:anton.misak@savba.sk) (A.M.); [marian.grman@savba.sk](mailto:marian.grman@savba.sk) (M.G.); [karol.ondrias@savba.sk](mailto:karol.ondrias@savba.sk) (K.O.)

<sup>2</sup> Department of Pharmacology and Toxicology, Faculty of Pharmacy, Comenius University, Bratislava, Slovak Republic; [kurakova4@uniba.sk](mailto:kurakova4@uniba.sk) (L.K.)

\* Correspondence: [karol.ondrias@savba.sk](mailto:karol.ondrias@savba.sk); Tel.: +421-908577943

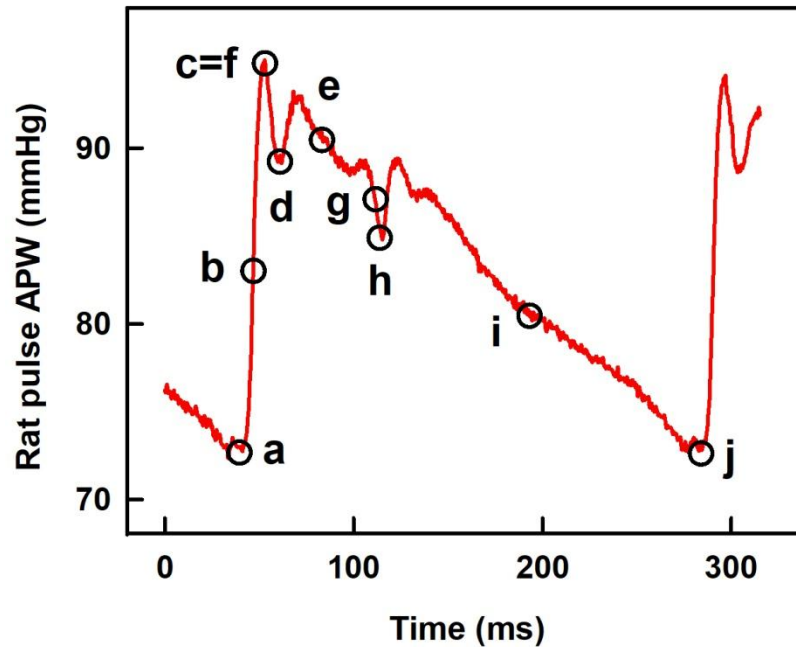

Figure S1. Ten points, **a – j**, on rat arterial pulse waveform (APW).

#### Description of 35 hemodynamic parameters (HPs) from APW.

Blood pressure and time position of ten points, **a – j**, on APW were used to define and calculate specific HP (Figure S1). For more details see Kurakova et al. 2020 (DOI: 10.1113/EP088148) and Misak et al. 2020 (doi.org/10.1155/2020/6578213).

Plot (a): Systolic blood pressure in mmHg; point **c** or **f**.

Plot (b): Heart rate in  $\text{min}^{-1}$ ;  $60 / (j - a)$ ;  $(j - a)$  represents time interval between **a** and **j**, **a** and **j** are two reference points to diastolic BP value.

Plot (c): Systolic area in mmHg s; integral BP of **a** to **h**; **h** refers to BP at the dicrotic notch (dicrotic BP).

Plot (d):  $dP/dt_{\max}$  in mmHg  $\text{ms}^{-1}$ ; maximum derivative at the point **b**; **P** is BP in mmHg.

Plot (e):  $dP/dt_{\max}$  relative level; relative level (shortly RL) of point **b**;  $(b - a) / (c \text{ (or } f) - a)$  in mmHg/mmHg (dimensionless).

Plot (f):  $dP/dt_d$  in mmHg  $\text{ms}^{-1}$ ; negative maximum derivative at the point **i**; the point **i** is the BP at the middle of the time interval between **h** and **j**.

Plot (g):  $dP/dt_d$  relative level, relative level of point **i**;  $(i - a) / (c \text{ (or } f) - a)$  in mmHg/mmHg (dimensionless).

Plot (h):  $dP/dt_d - dP/dt_{\max}$  in s; time interval between **b** and **i**,  $dP/dt_d - dP/dt_{\max} = (i - b)$ .

Plot (i):  $dP/dt_d - dP/dt_{min}$  in s; time interval between **g** and **i**,  $dP/dt_d - dP/dt_{min} = (i - g)$ ;  $dP/dt_{min}$  is negative maximum derivative at the point **g**.

Plot (j): Diastolic blood pressure in mmHg; the point **a** or **j**.

Plot (k): Pulse BP in mmHg;  $(c - a)$  or  $(f - a)$ .

Plot (l): Diastolic area in mmHg s; integral BP of **h** to **j**.

Plot (m):  $dP/dt_{min}$  in mmHg  $ms^{-1}$ ;  $dP/dt_{min}$  is maximum negative derivative at the point **g**.

Plot (n):  $dP/dt_{min}$  relative level, relative level of point **g**;  $(g - a) / (c \text{ (or } f) - a)$  in mmHg/mmHg (dimensionless).

Plot (o):  $dP/dt_{min}$  delay in s; delay in s of point **g**;  $(g - a)$  time interval between **a** and **g**.

Plot (p):  $dP/dt_d$  delay in s; delay in s of point **i**;  $(i - a)$  time interval between **a** and **i**.

Plot (q):  $dP/dt_d - dP/dt_{max}$  in mmHg;  $(i - b)$  BP difference between **b** and **i**.

Plot (r):  $dP/dt_d - dP/dt_{min}$  in mmHg;  $(i - g)$  BP difference between **g** and **i**.

Plot (aa): Systolic blood pressure in mmHg; point **c** or **f**. Plot (aa) is the same as (a).

Plot (bb): Anacrotic notch in mmHg; BP at the point **d**.

Plot (cc): Anacrotic notch relative level; relative level of point **d**;  $(d - a) / (c \text{ (or } f) - a)$  in mmHg/mmHg (dimensionless).

Plot (dd): Anacrotic notch delay in ms; delay in ms of point **d**;  $(d - a)$  time interval between **a** and **d**.

Plot (ee): Anacrotic notch relative delay; relative delay (shortly RD) of point **d**;  $(d - a) / (j - a)$  in ms/ms (dimensionless).

Plot (ff): [Dicrotic notch (DiN) in s] - [Anacrotic notch (AnN) in s] in s;  $(h - d)$  time interval between **d** and **h**.

Plot (gg):  $[(DiN - AnN) \text{ in s}] / [dP/dt_{min} \text{ in mmHg } \mu s^{-1}]^*$  in s/mmHg  $\mu s^{-1}$ ;  $(h - d) / g$ .

Plot (hh):  $[(DiN - AnN) \text{ in s}] / [dP/dt_{max} \text{ in mmHg } \mu s^{-1}]$  in s/mmHg  $\mu s^{-1}$ ;  $(h - d) / b$ .

Plot (ii):  $[AnN \text{ in ms}] - [1Max \text{ (point } c \text{ or the 1th. maximum) in ms}]$  in ms;  $(d - c)$  time interval between **c** and **d**.

Plot (jj): Augmentation index relative;  $(f - c) / (f - a)$  in mmHg/mmHg (dimensionless).

Plot (kk): Dicrotic notch in mmHg; BP at the point **h**.

Plot (ll): Dicrotic notch relative level; relative level of point **h**;  $(h - a) / (c \text{ (or } f) - a)$  in mmHg/mmHg (dimensionless).

Plot (mm): Dicrotic notch delay in ms, delay in ms of point **h**;  $(h - a)$ .time interval between **a** and **h**.

Plot (nn): Dicrotic notch relative delay; relative delay of point **h**;  $(h - a) / (j - a)$ ; in ms/ms (dimensionless)

Plot (oo):  $[DiN \text{ in mmHg}] - [AnN \text{ in mmHg}]$  in mmHg;  $(h - d)$  BP difference between **d** and **h**;

Plot (pp):  $[(DiN - AnN) \text{ in mmHg}] / [dP/dt_{min} \text{ in mmHg } ms^{-1}]$  in mmHg/mmHg  $ms^{-1}$ ;  $(h - d) / g$ ;

Plot (qq):  $[(DiN - AnN) \text{ in mmHg}] / [dP/dt_{max} \text{ in mmHg } ms^{-1}]$  in mmHg/mmHg  $ms^{-1}$ ;  $(h - d) / b$ .

Plot (rr):  $[AnN \text{ in mmHg}] - [1Max \text{ (point } c \text{ or the 1th. maximum) in mmHg}]$  in mmHg;  $(d - c)$  BP difference between **c** and **d**.

\*Units in plots (gg), (hh), (pp) and (qq) are informative only.

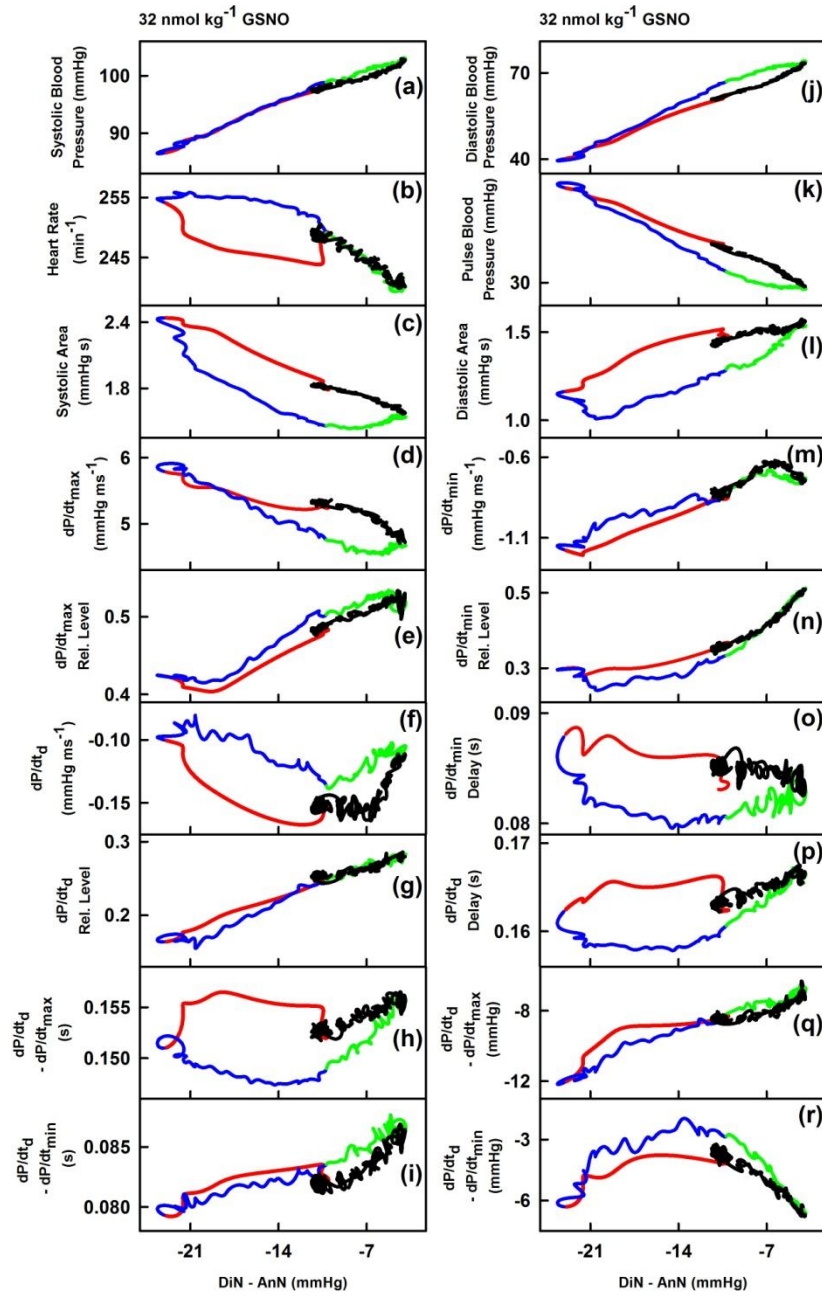

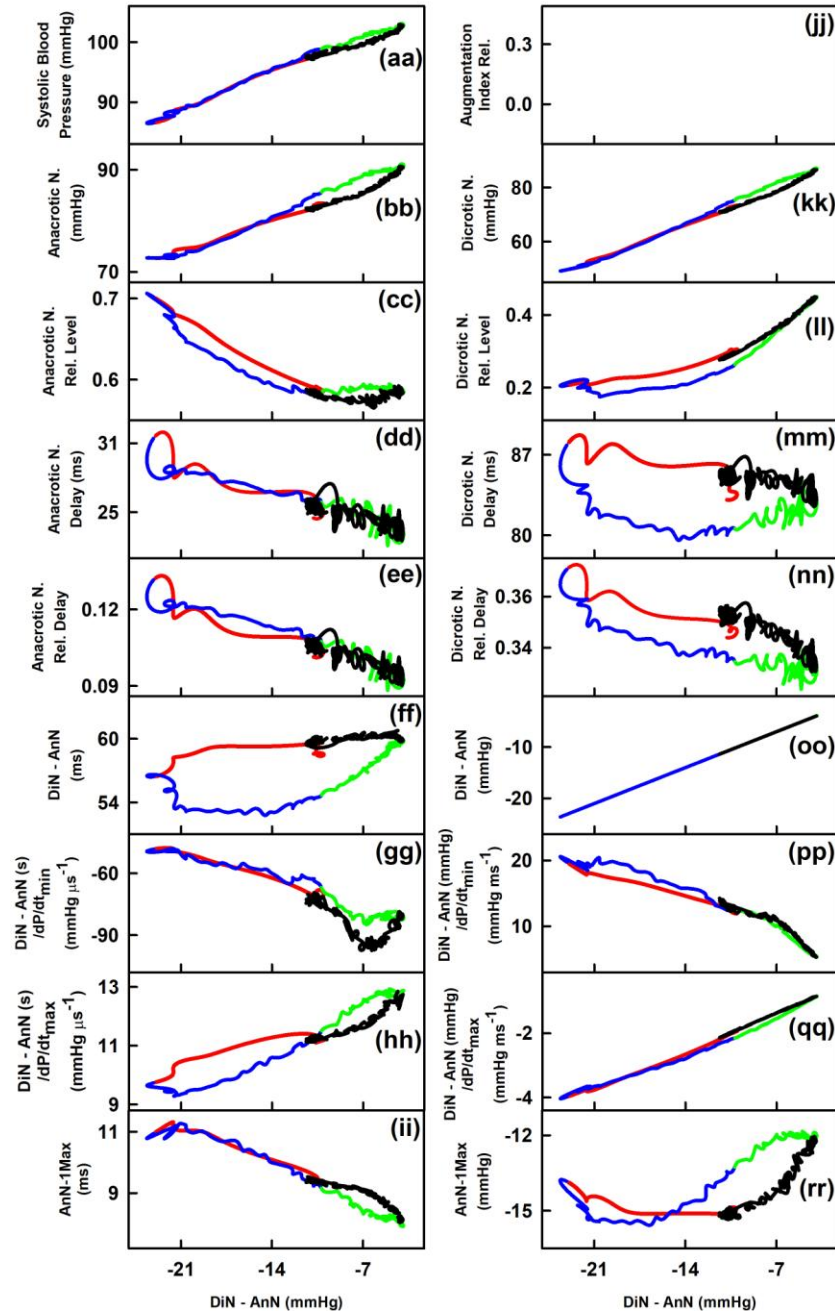

**Figure S2A.** Relationships of HPs to the blood pressure (BP) interval between dicrotic (DiN) and anacrotic (AnN) notches after the administration of 32 nmol kg<sup>-1</sup> S-nitrosoglutathione (GSNO). The colors and time dependent data correspond to Figure 2. The hysteresis was arbitrary defined as HPs-(DiN-AnN in mmHg) loop > 5 mmHg of DiN-AnN. The non-hysteresis was arbitrary defined as HPs-(DiN-AnN in mmHg) loop ≤ 5 mmHg of DiN-AnN.

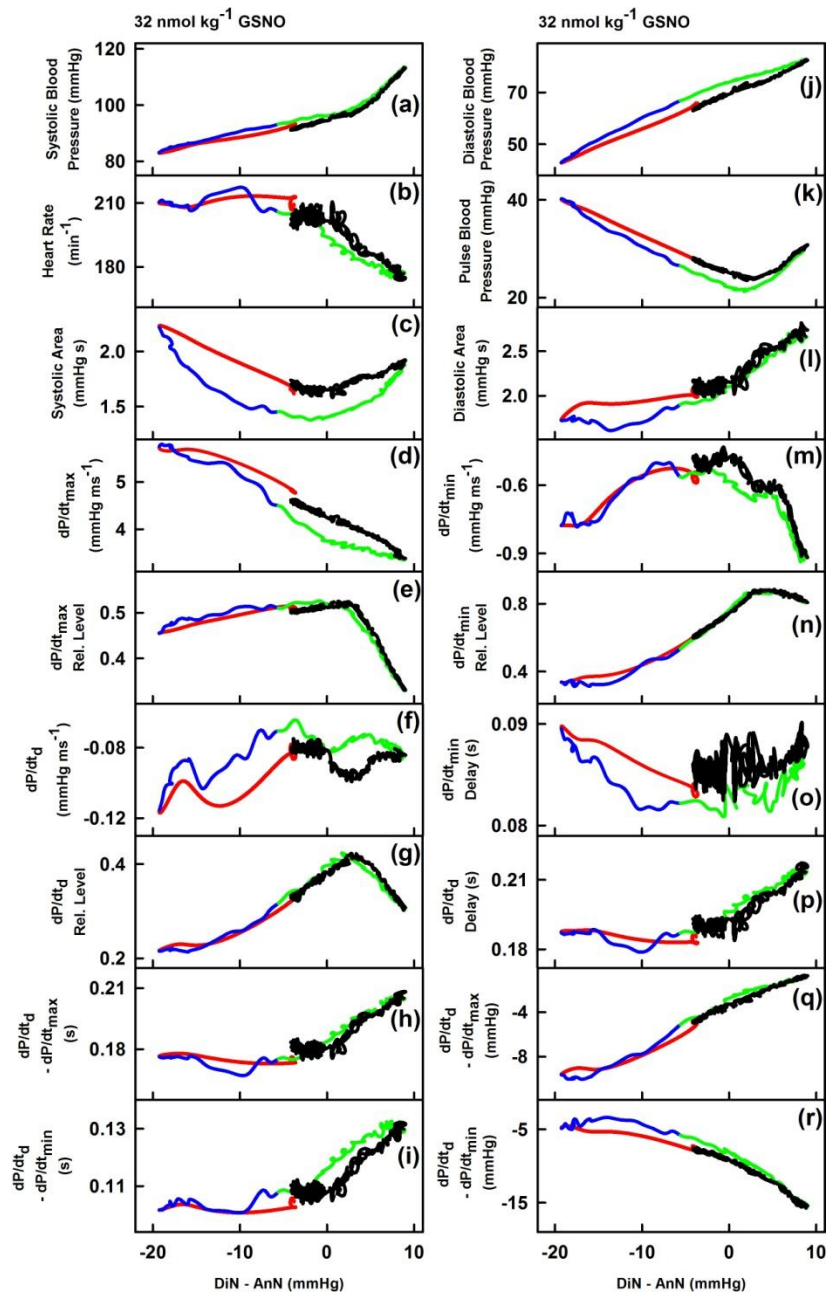

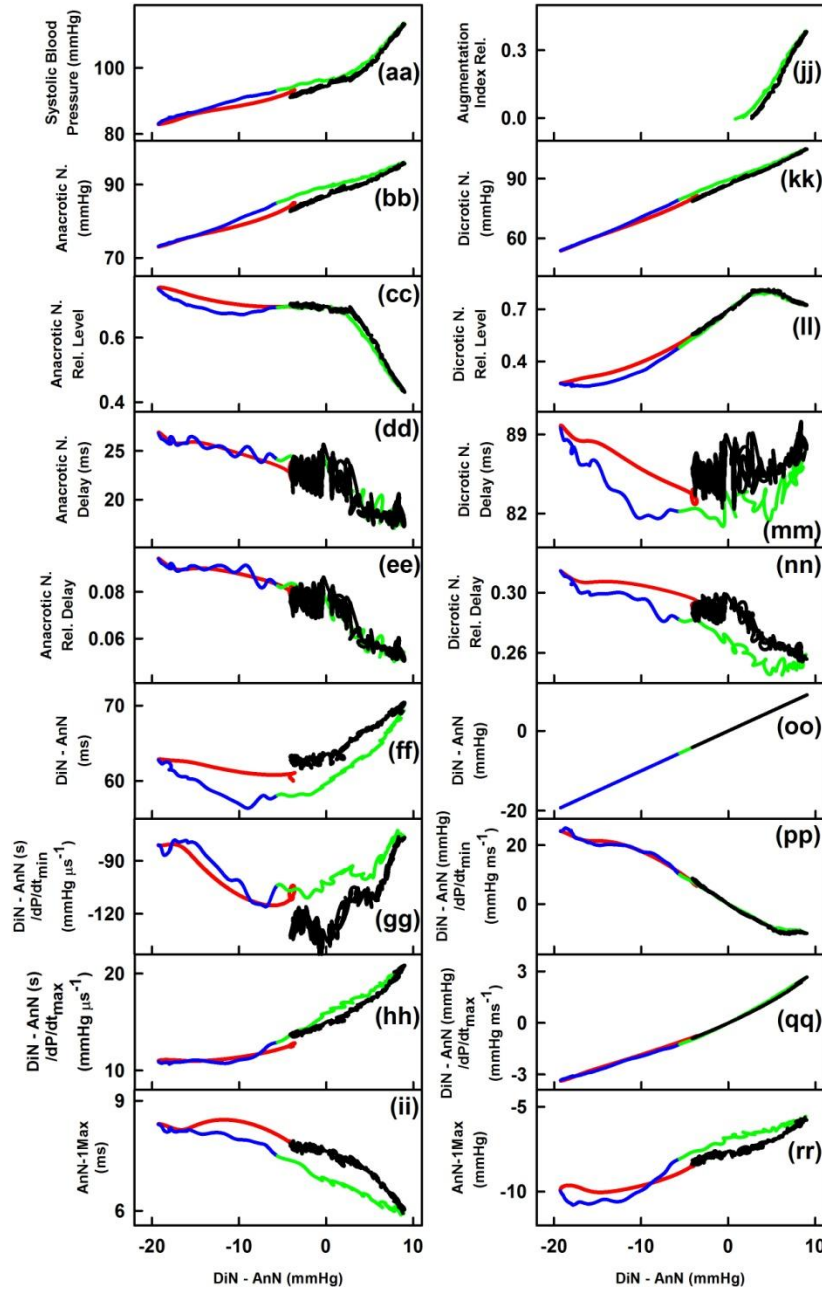

**Figure S2B.** Relationships of HPs to the BP interval between dicrotic (DiN) and anacrotic (AnN) notches after the administration of 32 nmol kg<sup>-1</sup> GSNO. The colors and time dependent data correspond to Figure 2. The hysteresis was arbitrary defined as HPs-(DiN-AnN in mmHg) loop > 5 mmHg of DiN-AnN. The non-hysteresis was arbitrary defined as HPs-(DiN-AnN in mmHg) loop ≤ 5 mmHg of DiN-AnN.

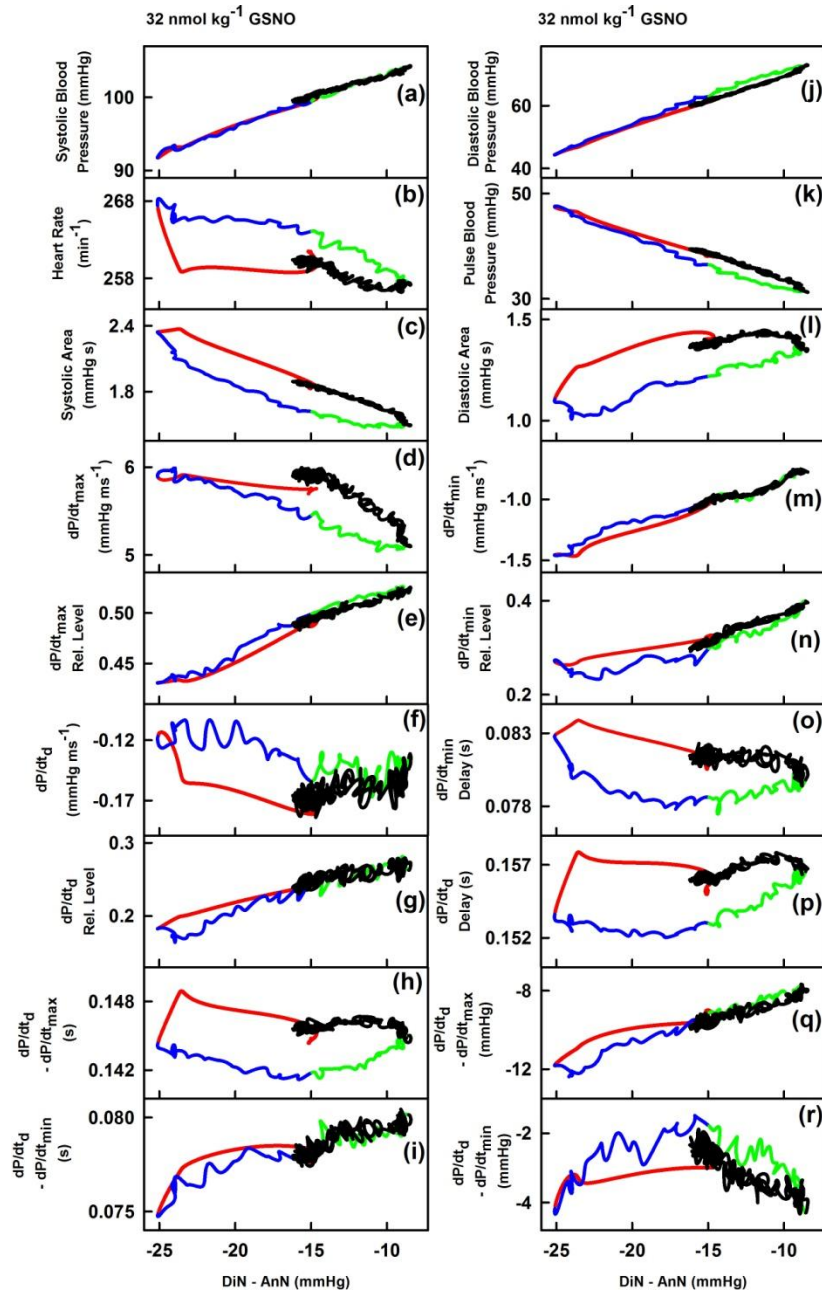

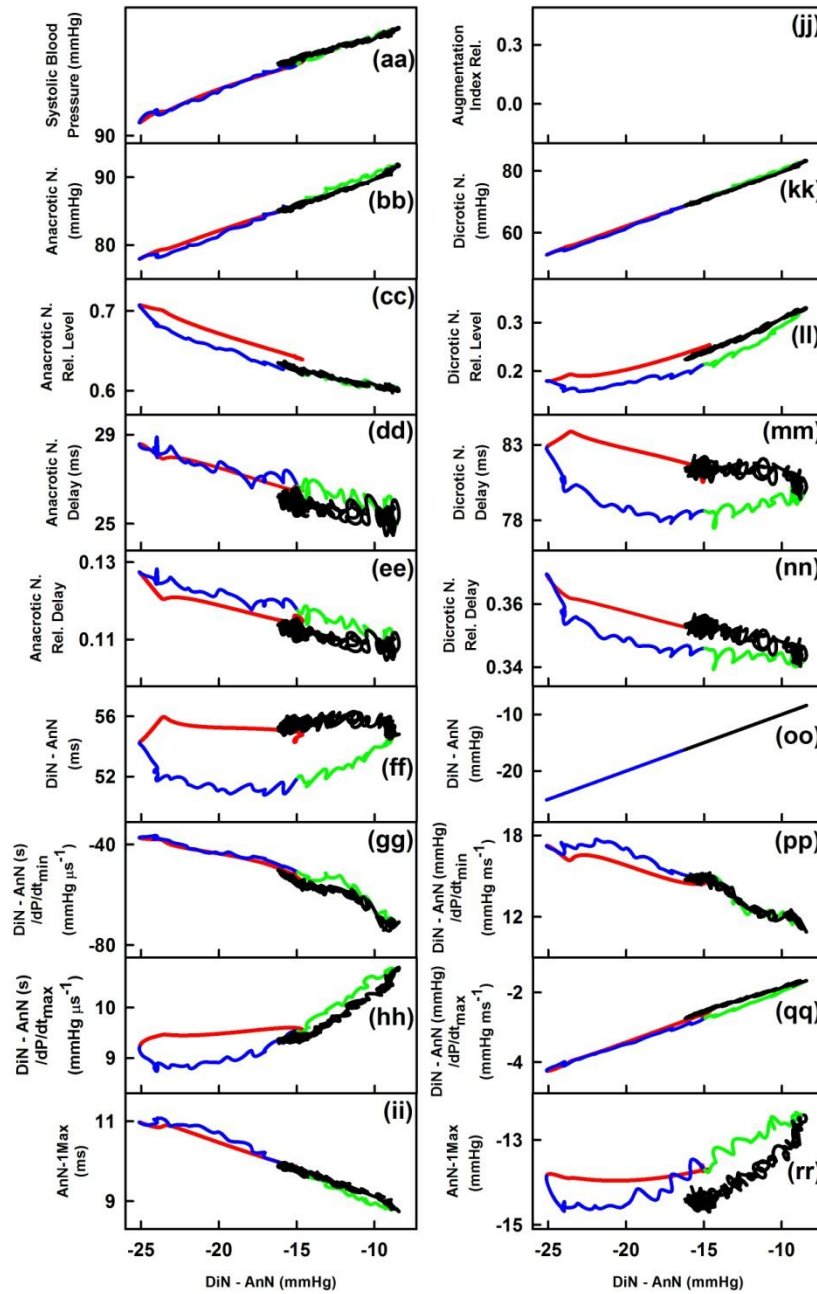

**Figure S2C.** Relationships of HPs to the BP interval between dicrotic (DiN) and anacrotic (AnN) notches after the administration of 32 nmol kg<sup>-1</sup> GSNO. The colors and time dependent data correspond to Figure 2. The hysteresis was arbitrary defined as HPs-(DiN-AnN in mmHg) loop > 5 mmHg of DiN-AnN. The non-hysteresis was arbitrary defined as HPs-(DiN-AnN in mmHg) loop ≤ 5 mmHg of DiN-AnN.

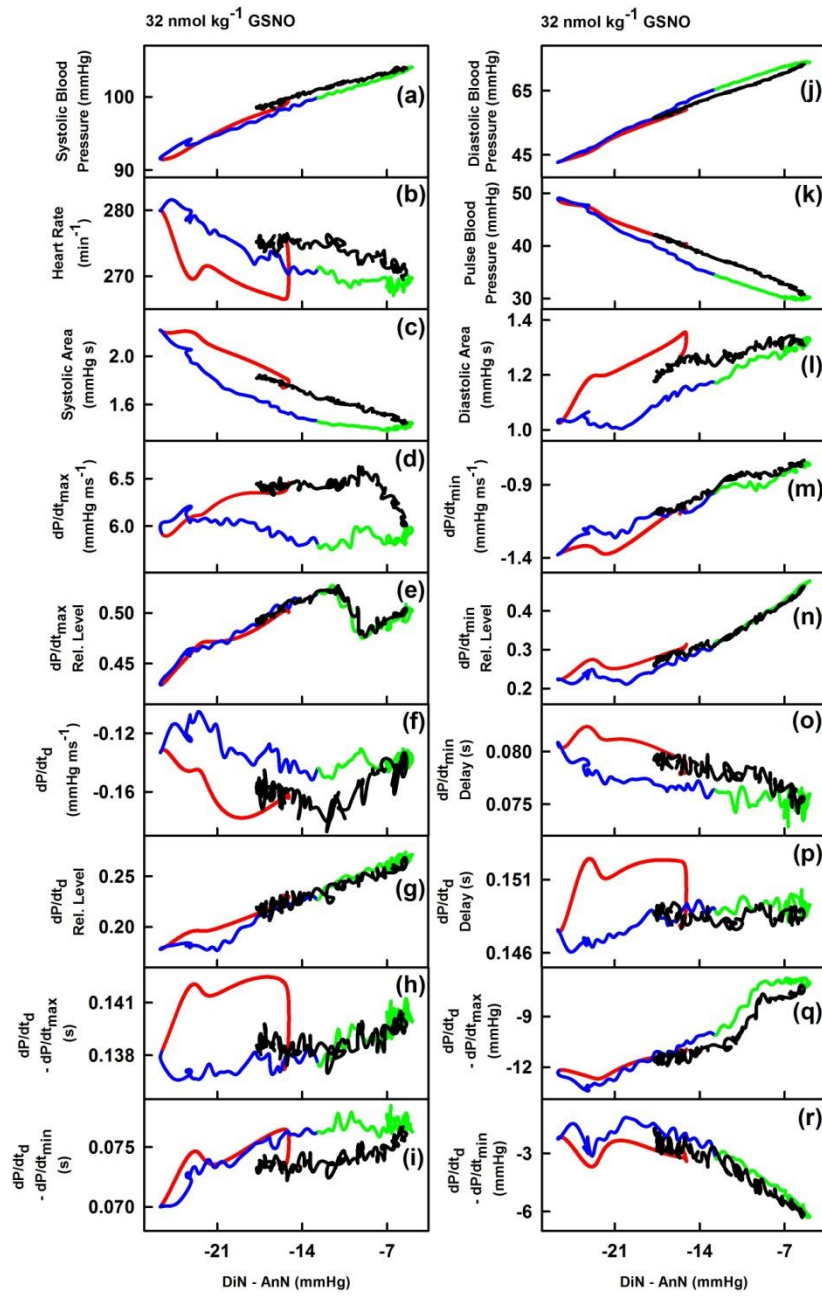

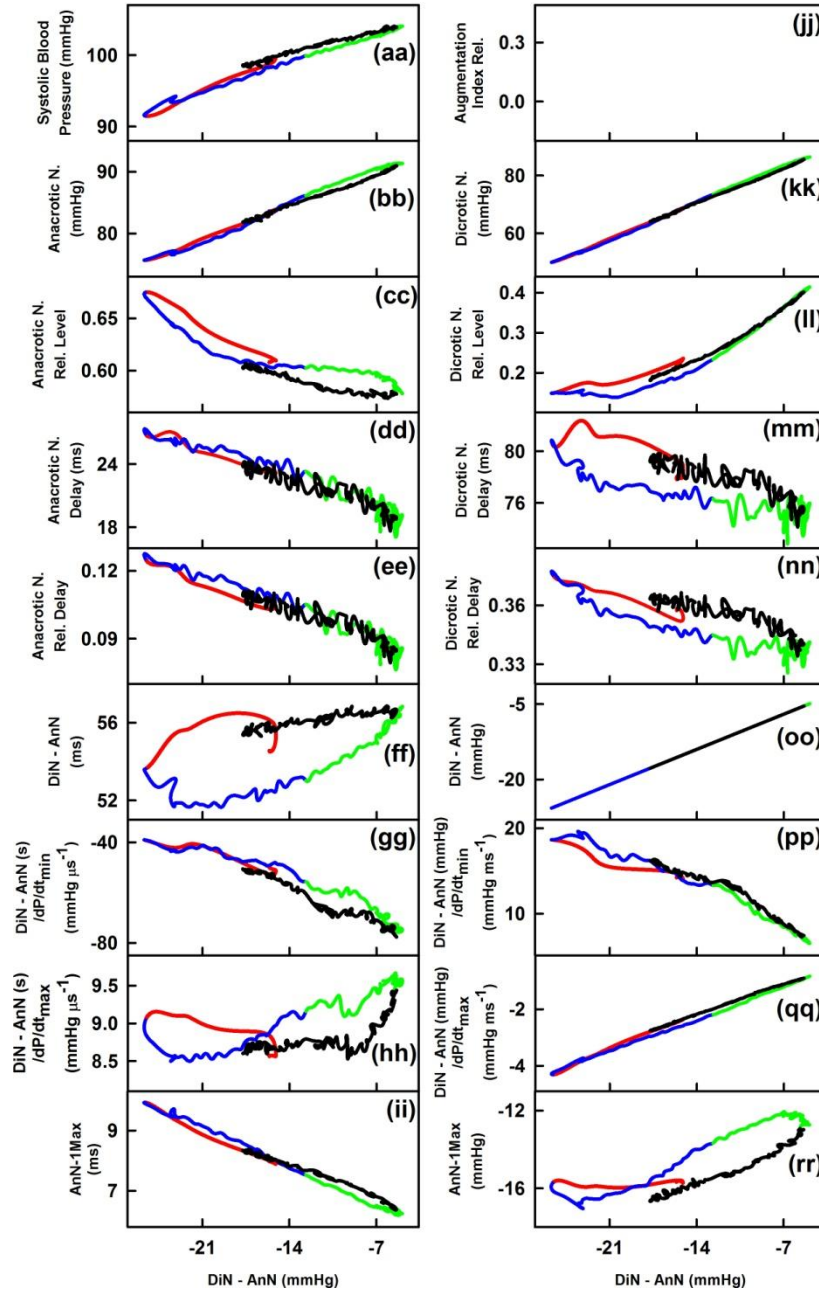

**Figure S2D.** Relationships of HPs to the BP interval between dicrotic (DiN) and anacrotic (AnN) notches after the administration of 32 nmol kg<sup>-1</sup> GSNO. The colors and time dependent data correspond to Figure 2. The hysteresis was arbitrary defined as HPs-(DiN-AnN in mmHg) loop > 5 mmHg of DiN-AnN. The non-hysteresis was arbitrary defined as HPs-(DiN-AnN in mmHg) loop ≤ 5 mmHg of DiN-AnN.

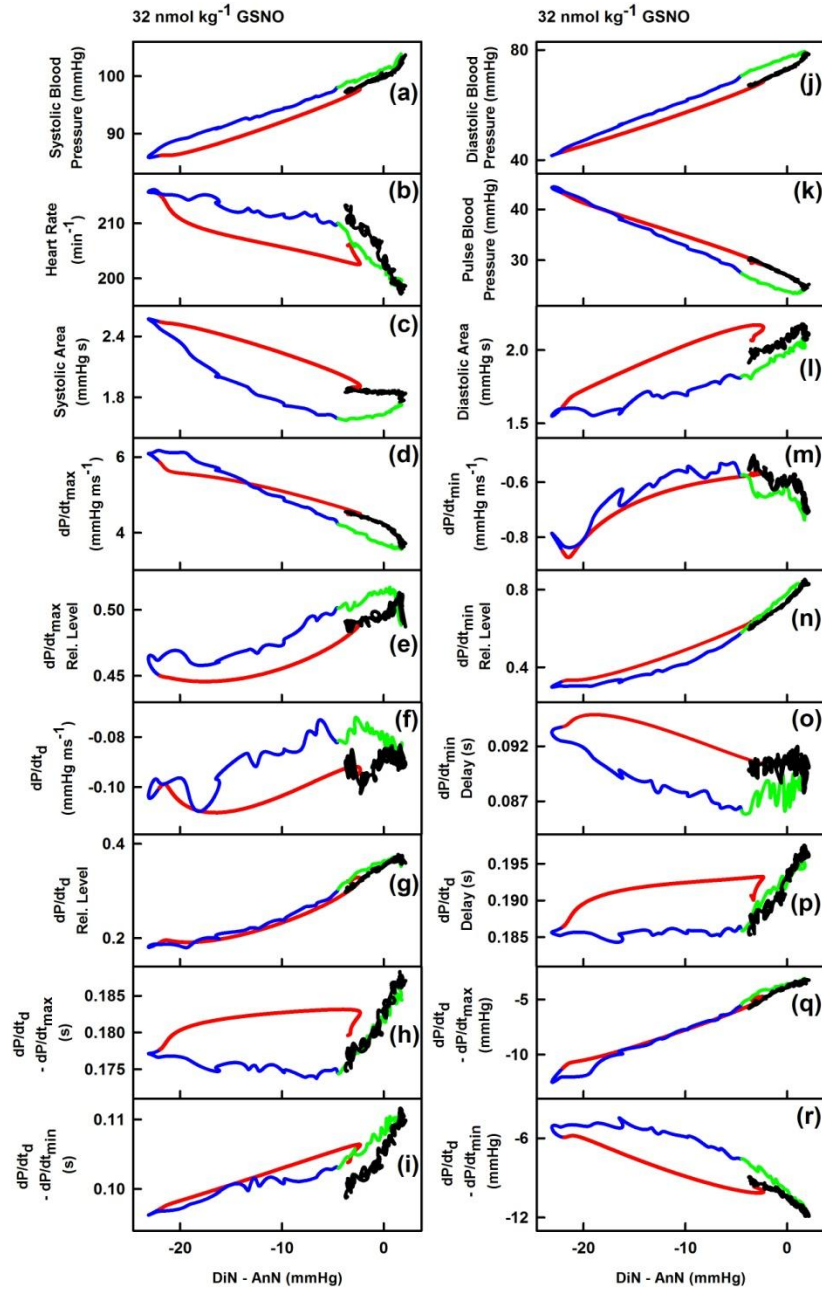

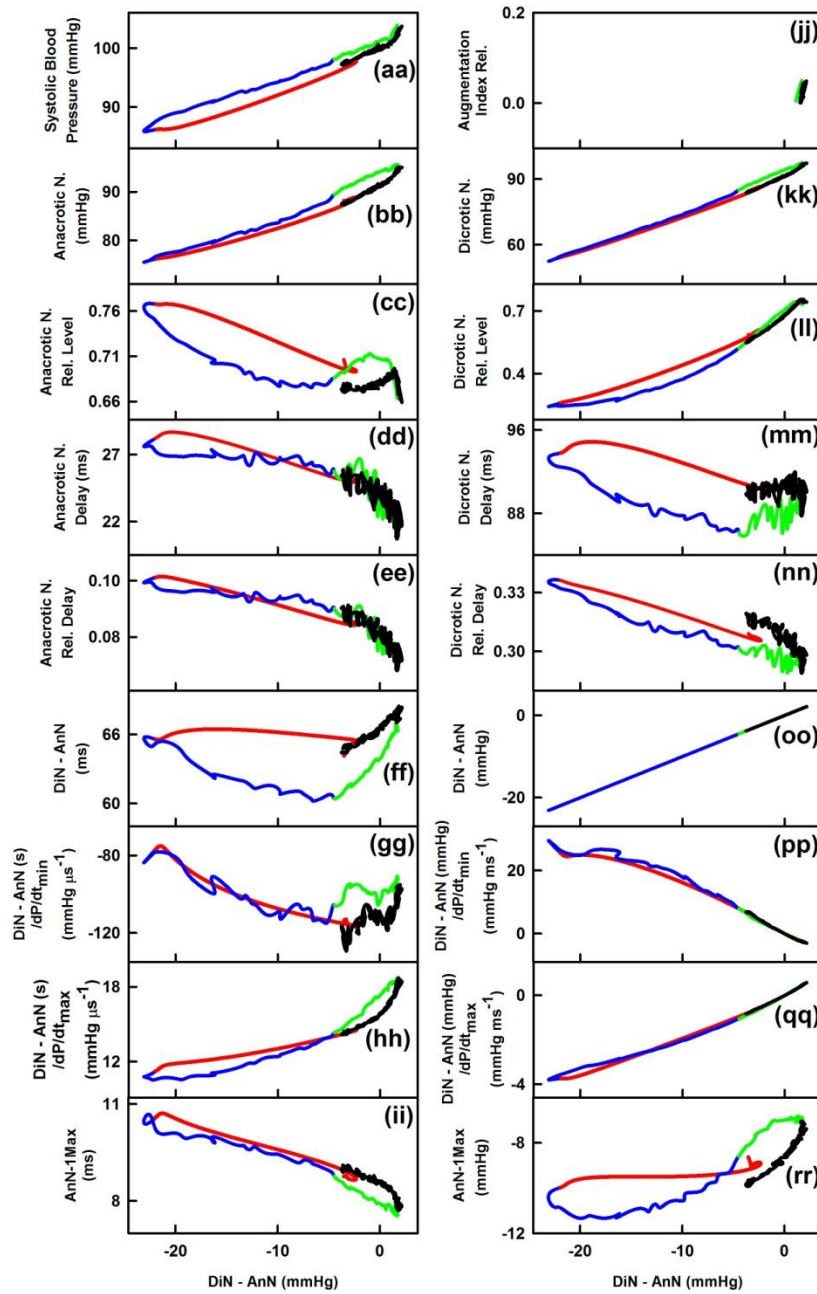

**Figure S2E.** Relationships of HPs to the BP interval between dicrotic (DiN) and anacrotic (AnN) notches after the administration of 32 nmol kg<sup>-1</sup> GSNO. The colors and time dependent data correspond to Figure 2. The hysteresis was arbitrary defined as HPs-(DiN-AnN in mmHg) loop > 5 mmHg of DiN-AnN. The non-hysteresis was arbitrary defined as HPs-(DiN-AnN in mmHg) loop ≤ 5 mmHg of DiN-AnN.

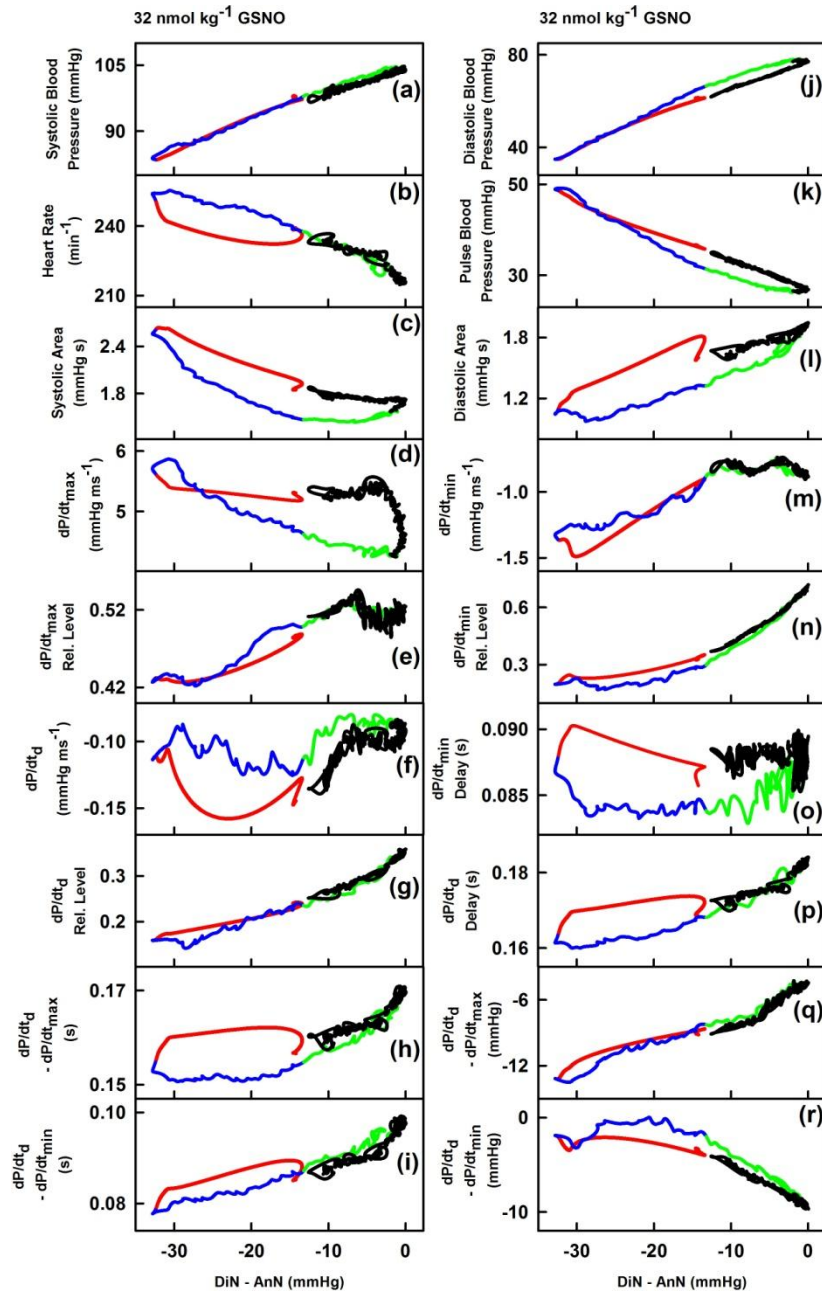

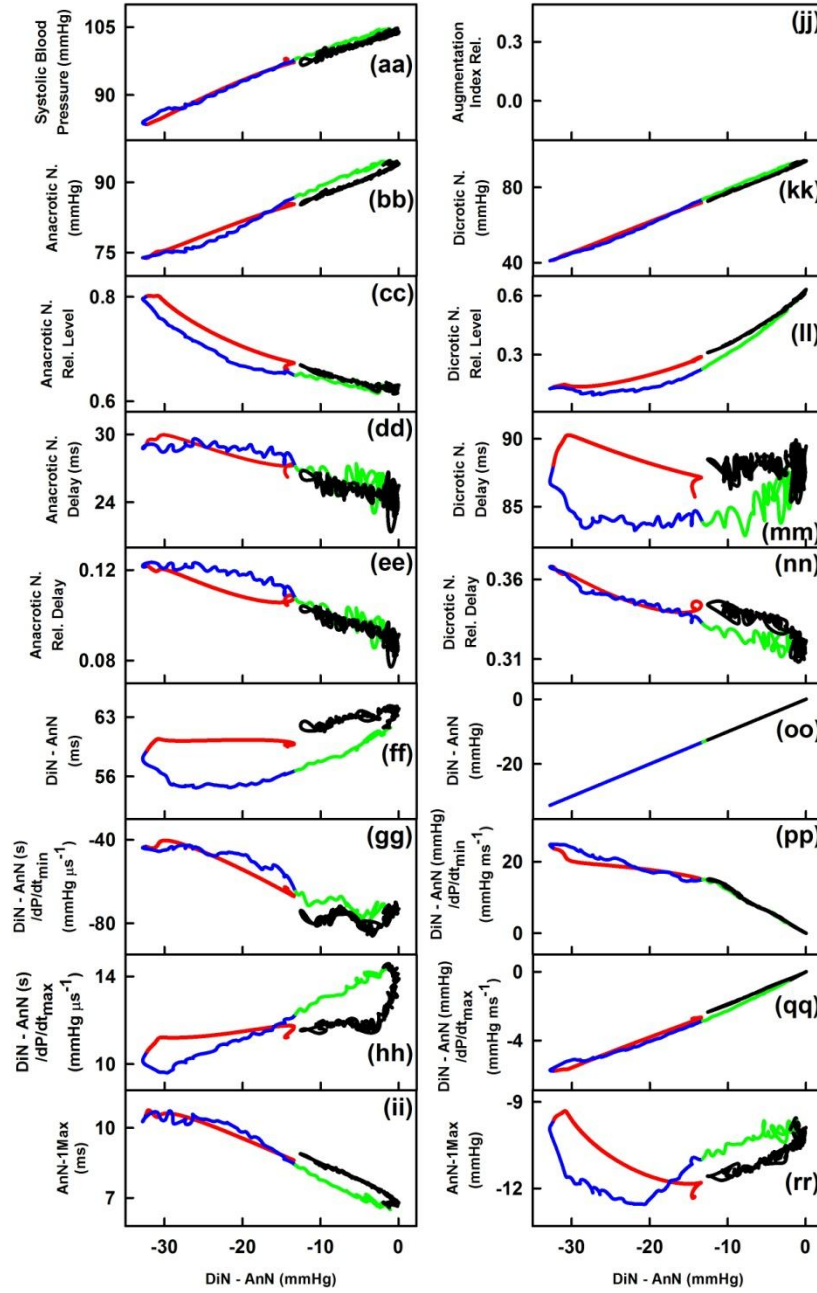

**Figure S2F.** Relationships of HPs to the BP interval between dicrotic (DiN) and anacrotic (AnN) notches after the administration of 32 nmol kg<sup>-1</sup> GSNO. The colors and time dependent data correspond to Figure 2. The hysteresis was arbitrary defined as HPs-(DiN-AnN in mmHg) loop > 5 mmHg of DiN-AnN. The non-hysteresis was arbitrary defined as HPs-(DiN-AnN in mmHg) loop ≤ 5 mmHg of DiN-AnN.

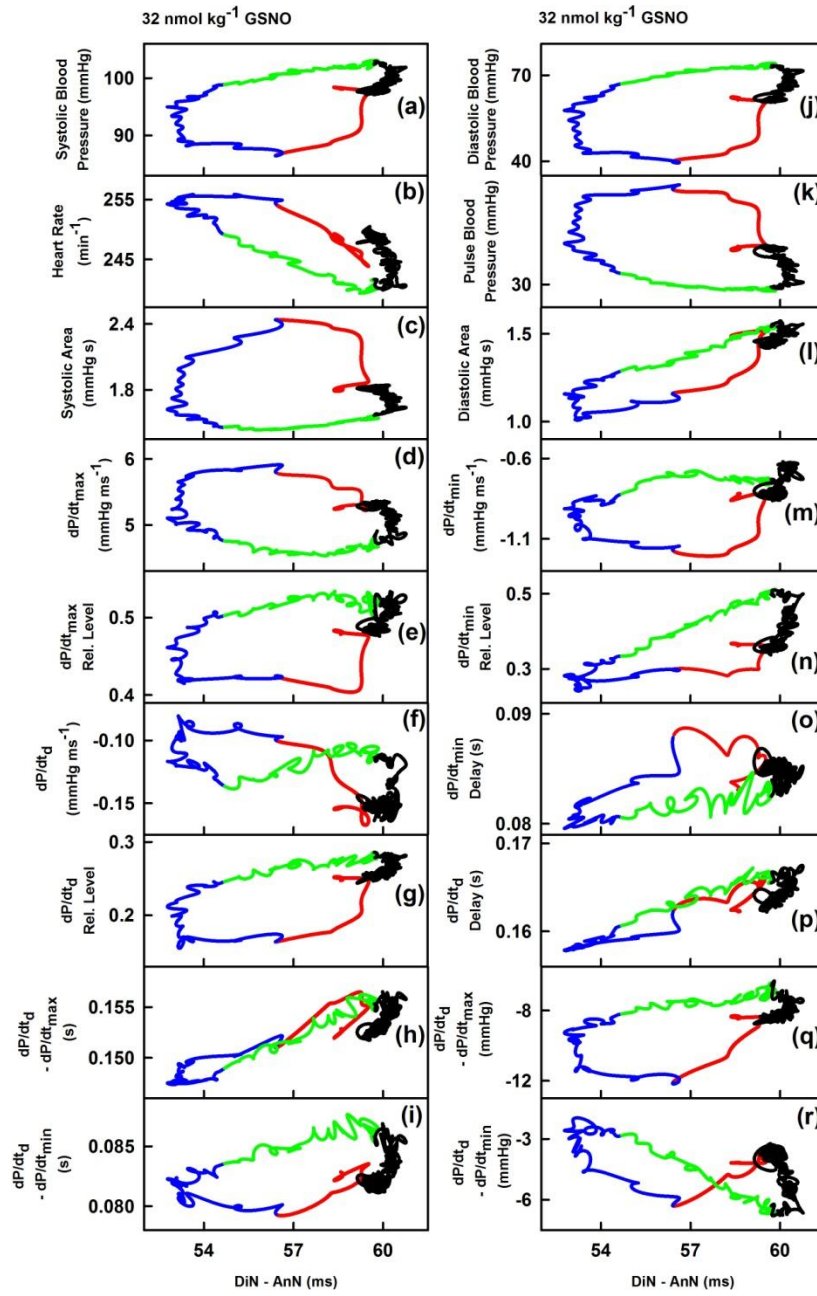

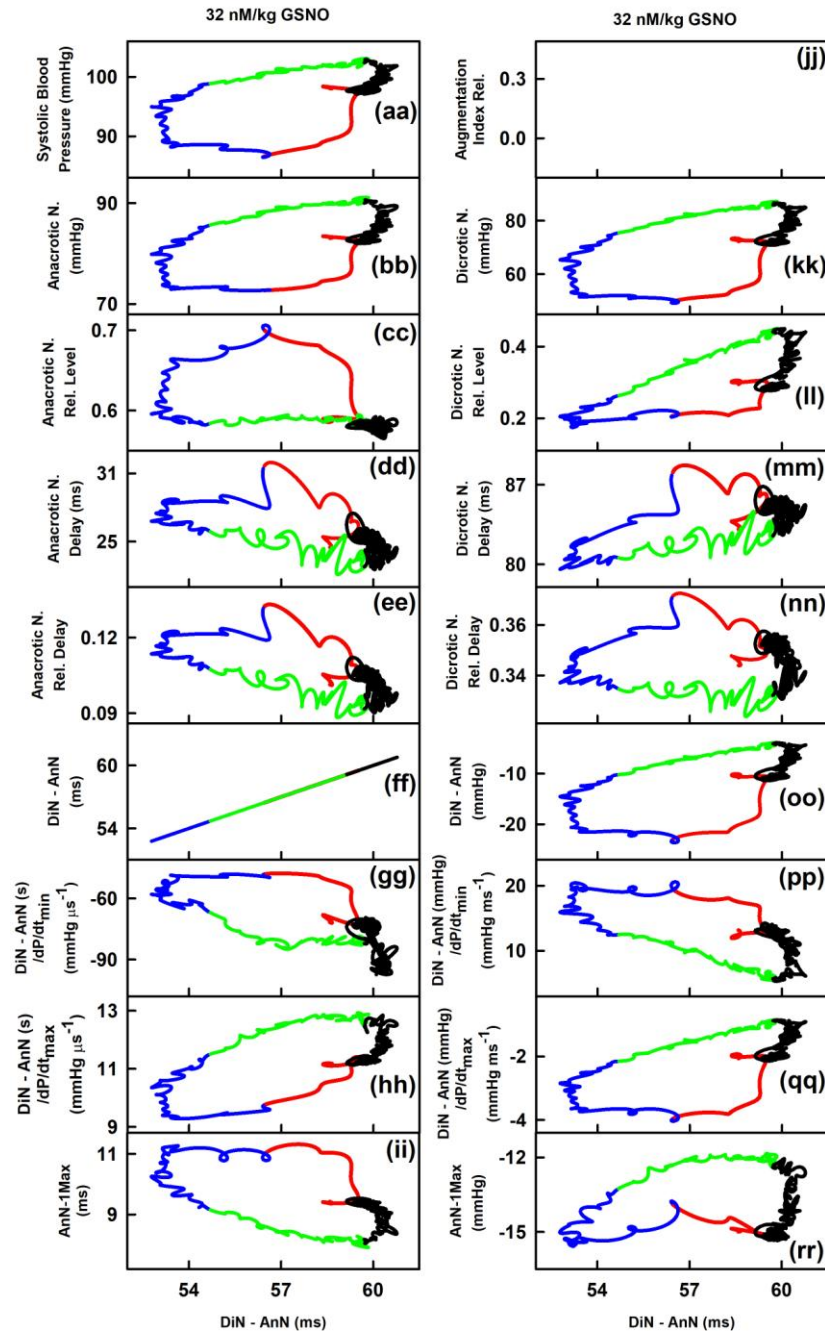

**Figure S3A.** Relationships of HPs to the time interval between dicrotic (DiN) and anacrotic (AnN) notches after the administration of 32 nmol kg<sup>-1</sup> GSNO. The colors and time dependent data correspond to Figure 2. The hysteresis was arbitrary defined as HPs-(DiN-AnN in ms) loop > 3 ms of DiN-AnN.

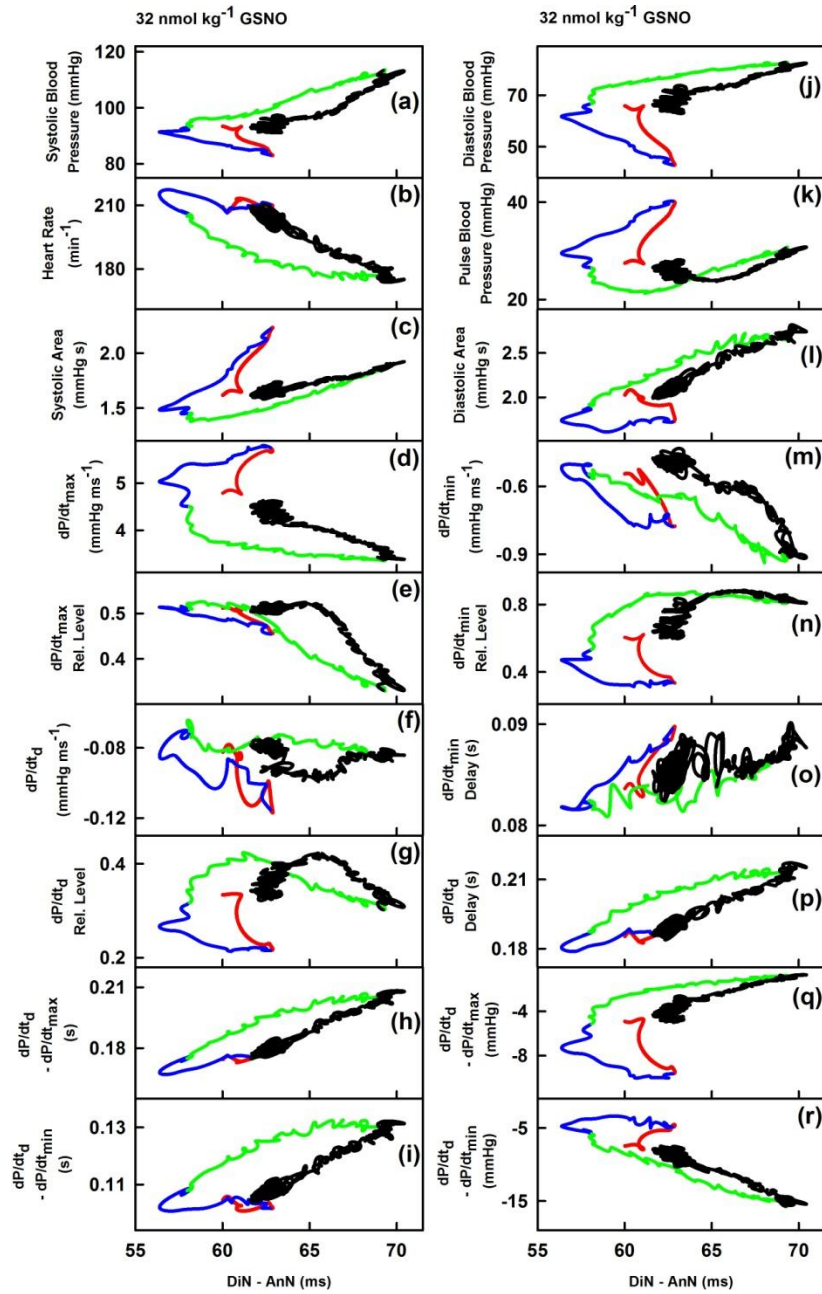

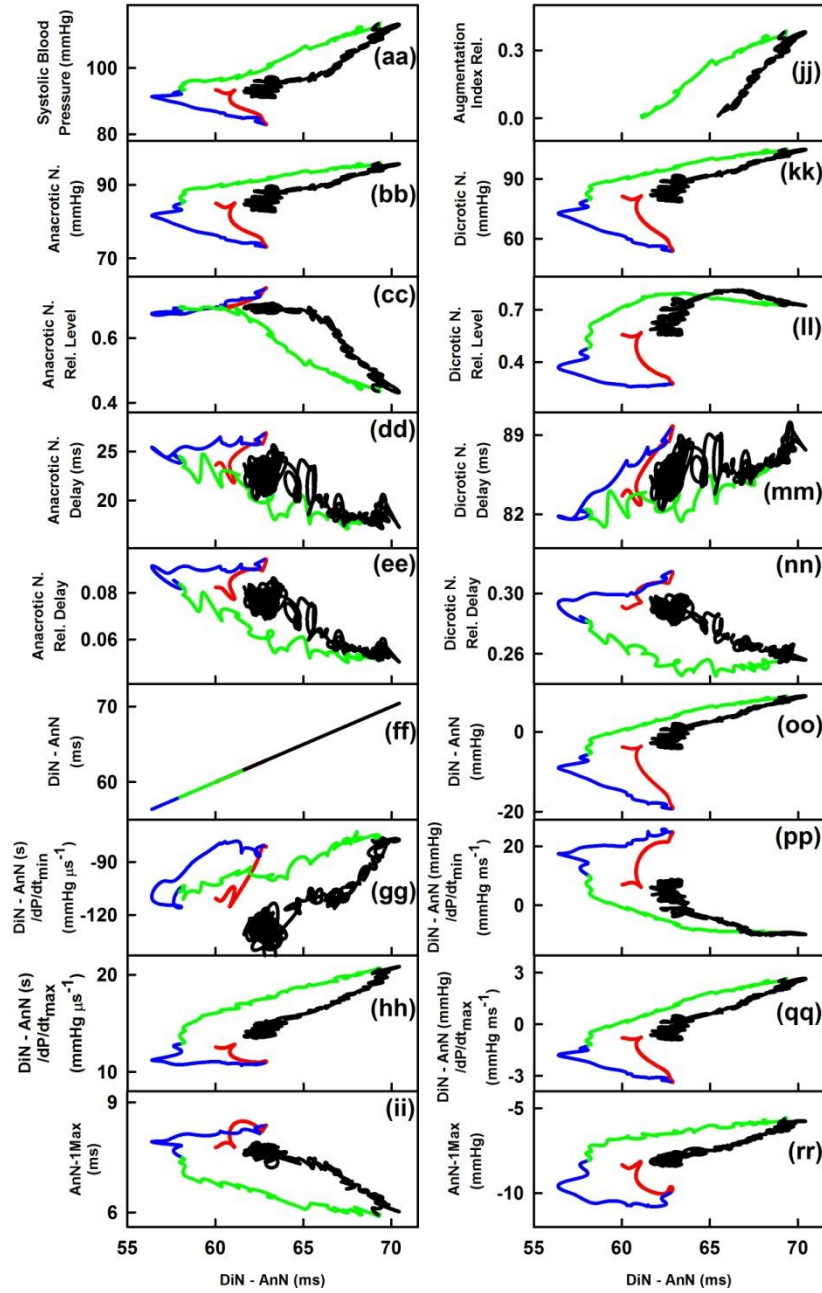

**Figure S3B.** Relationships of HPs to the time interval between dicrotic (DiN) and anacrotic (AnN) notches after the administration of 32 nmol kg<sup>-1</sup> GSNO. The colors and time dependent data correspond to Figure 2. The hysteresis was arbitrary defined as HPs-(DiN-AnN in ms) loop > 3 ms of DiN-AnN.

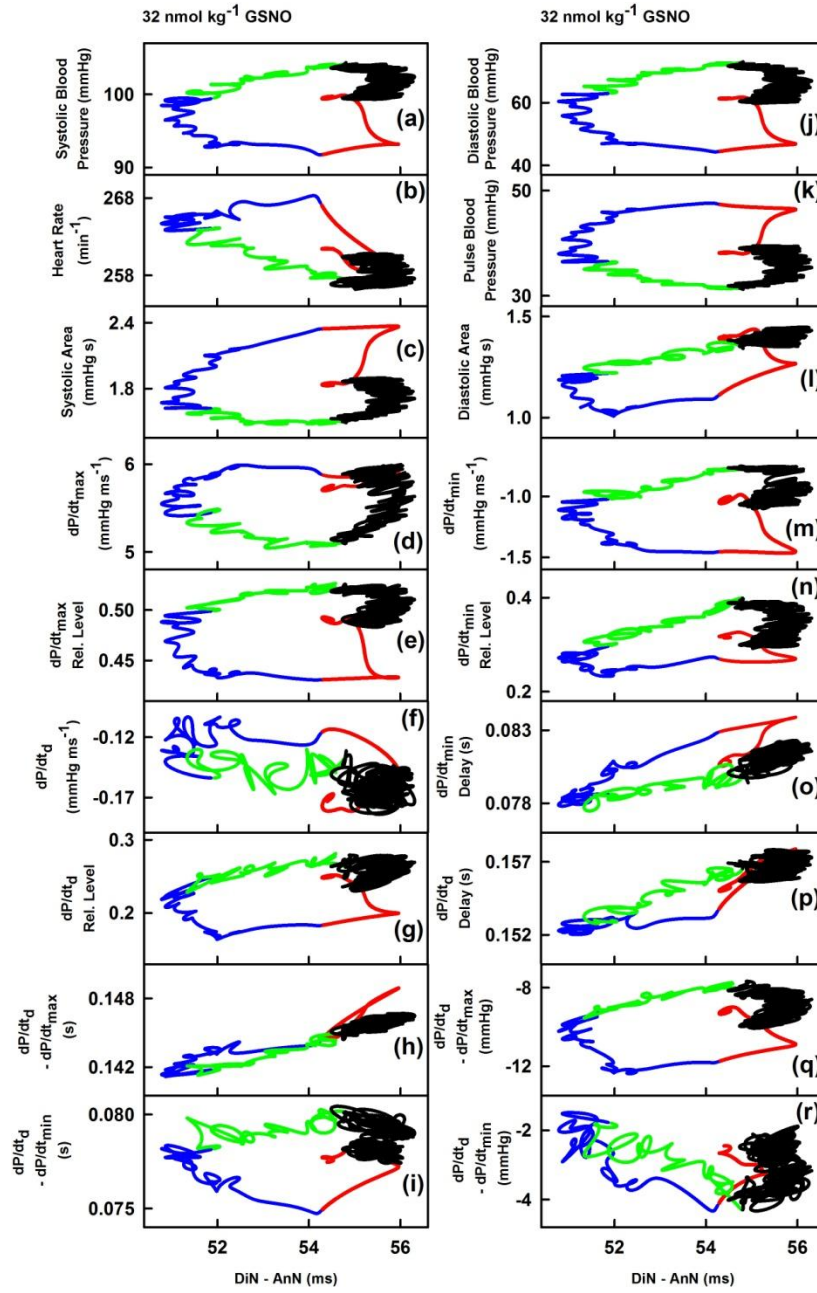

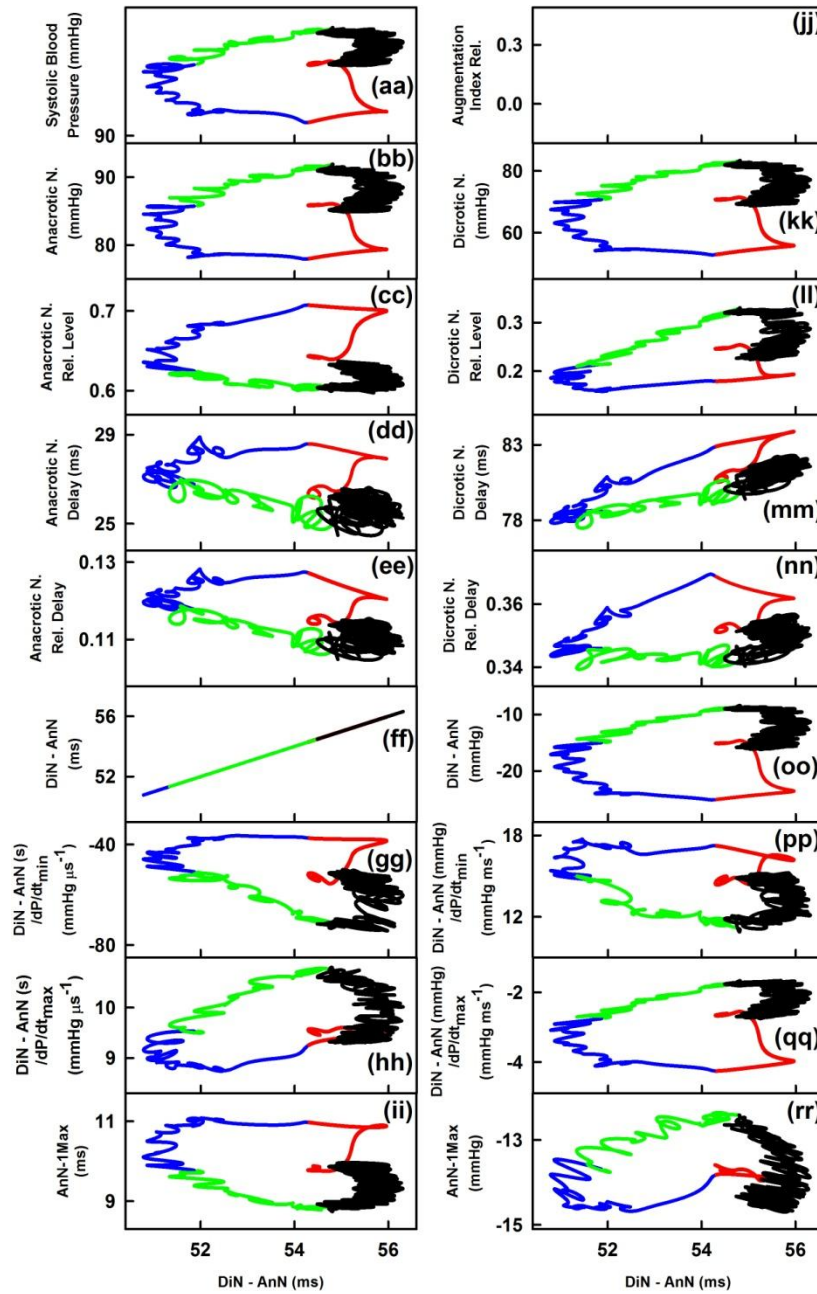

**Figure S3C.** Relationships of HPs to the time interval between dicrotic (DiN) and anacrotic (AnN) notches after the administration of 32 nmol kg<sup>-1</sup> GSNO. The colors and time dependent data correspond to Figure 2. The hysteresis was arbitrary defined as HPs-(DiN-AnN in ms) loop > 3 ms of DiN-AnN.

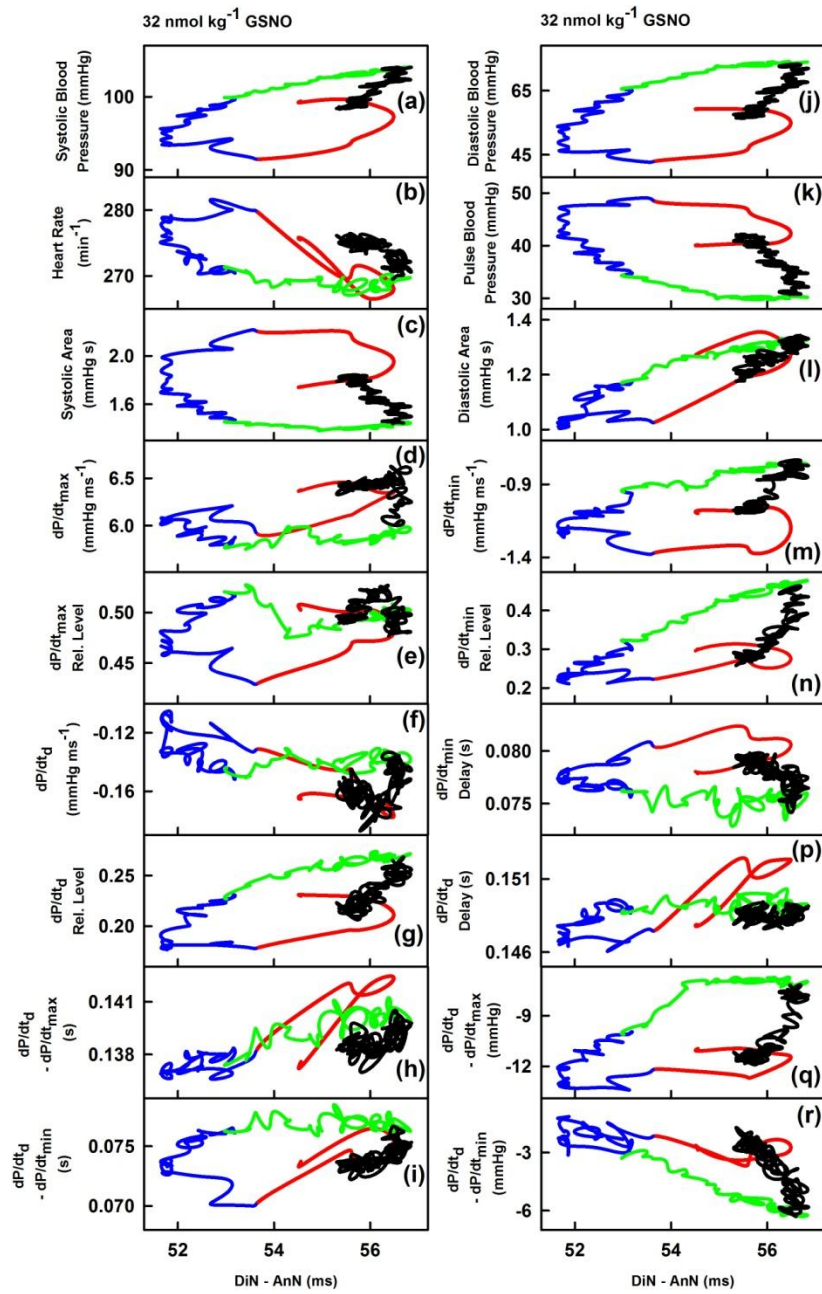

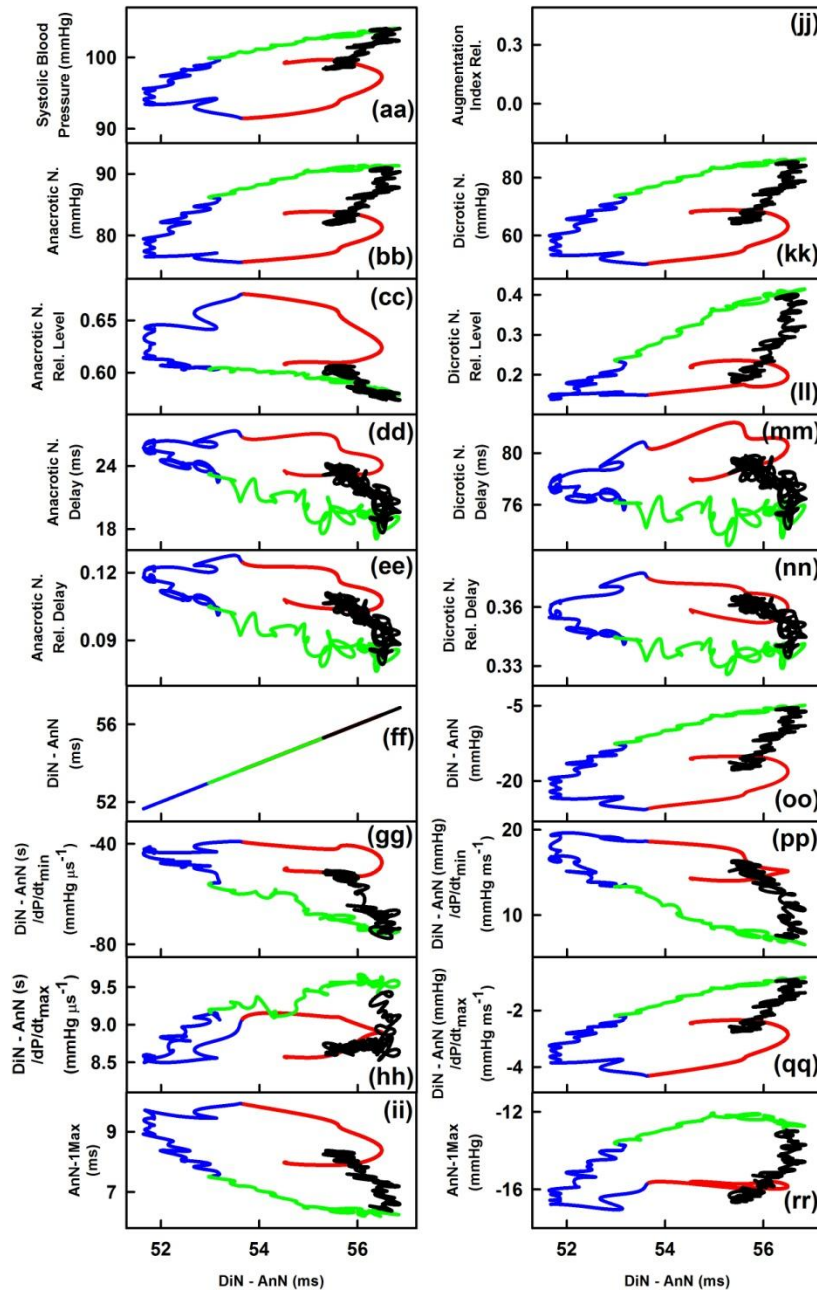

**Figure S3D.** Relationships of HPs to the time interval between dicrotic (DiN) and anacrotic (AnN) notches after the administration of 32 nmol kg<sup>-1</sup> GSNO. The colors and time dependent data correspond to Figure 2. The hysteresis was arbitrary defined as HPs-(DiN-AnN in ms) loop > 3 ms of DiN-AnN.

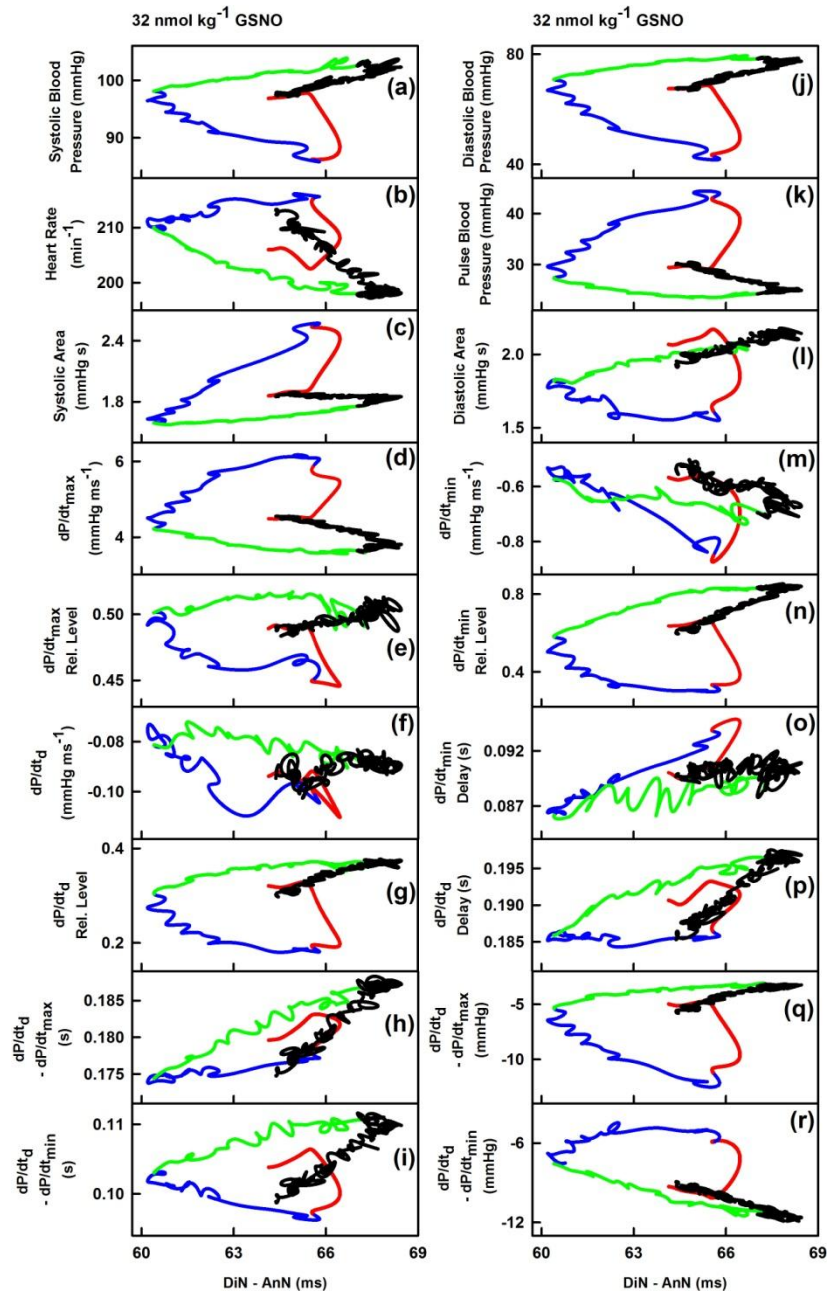

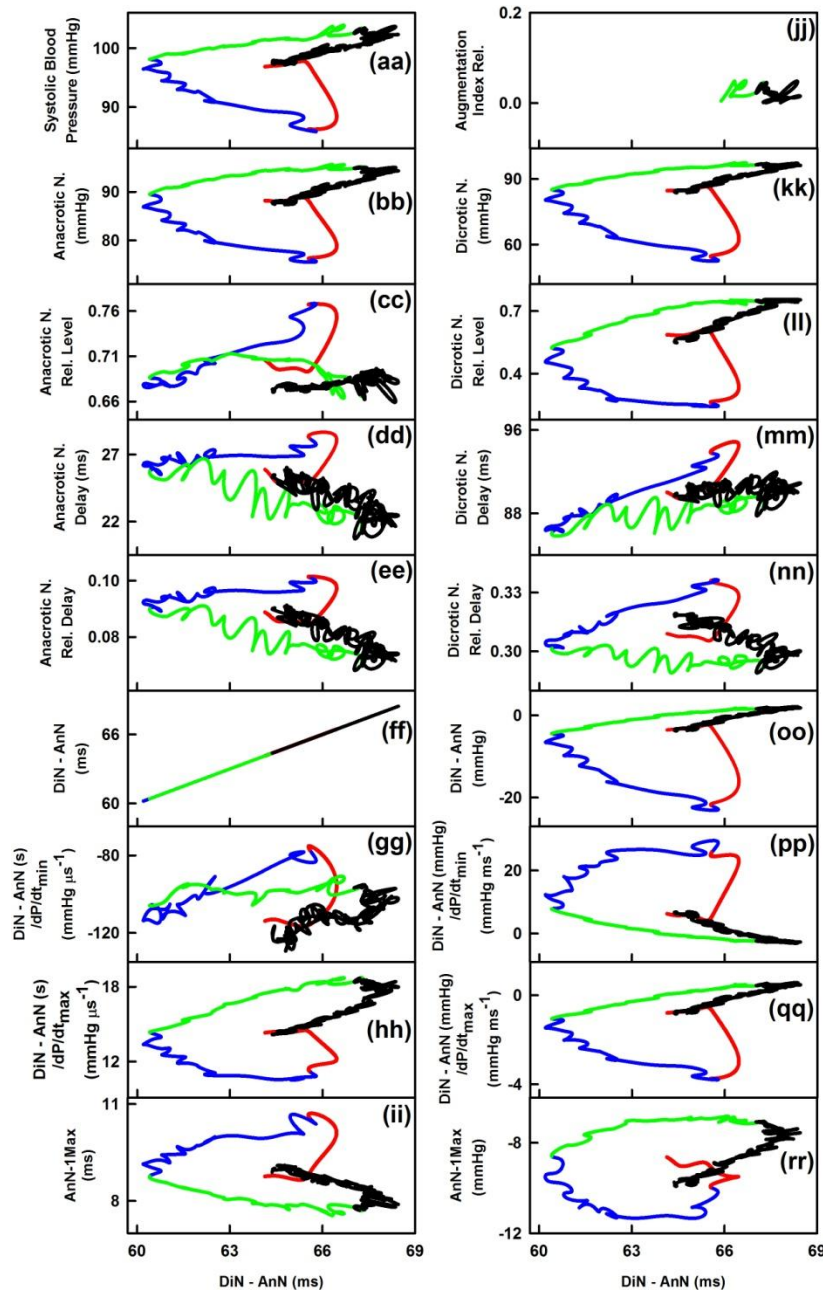

**Figure S3E.** Relationships of HPs to the time interval between dicrotic (DiN) and anacrotic (AnN) notches after the administration of 32 nmol kg<sup>-1</sup> GSNO. The colors and time dependent data correspond to Figure 2. The hysteresis was arbitrary defined as HPs-(DiN-AnN in ms) loop > 3 ms of DiN-AnN.

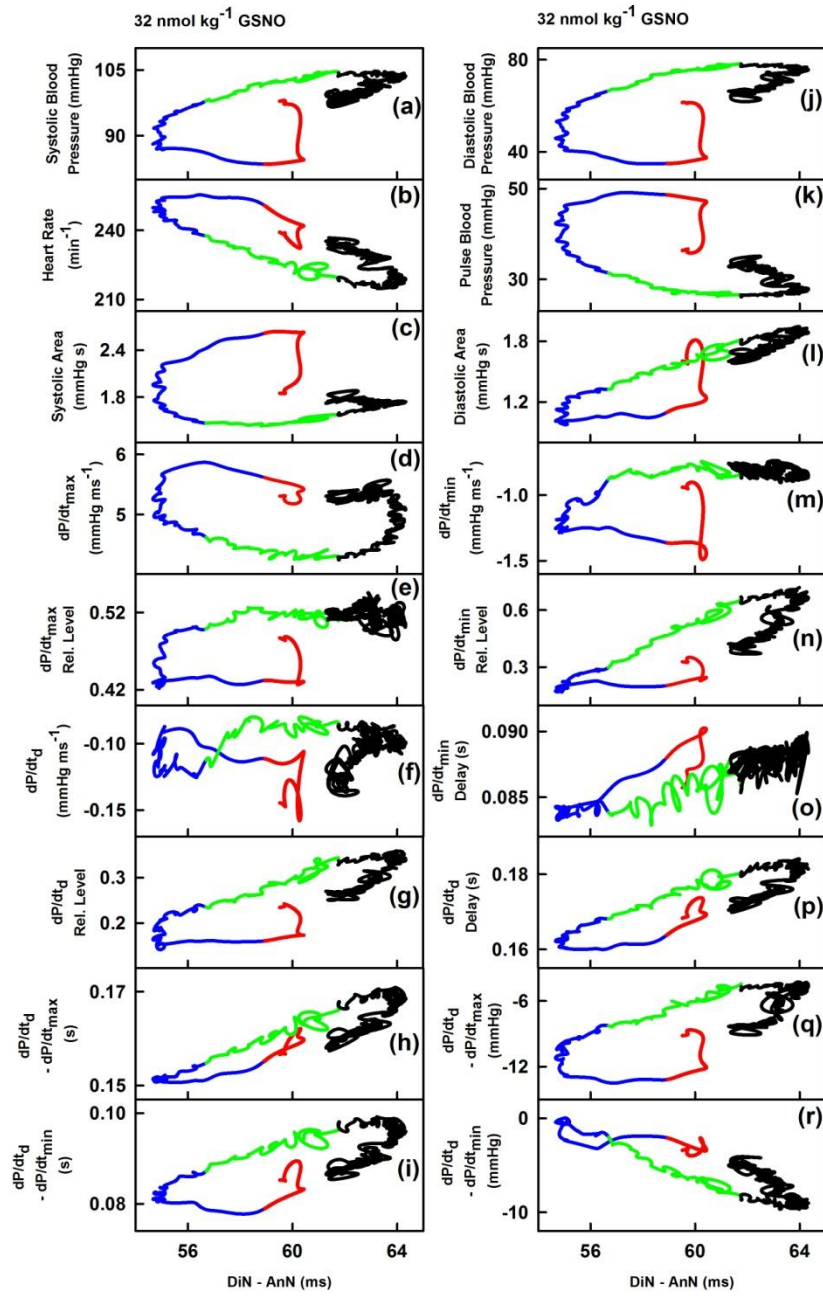

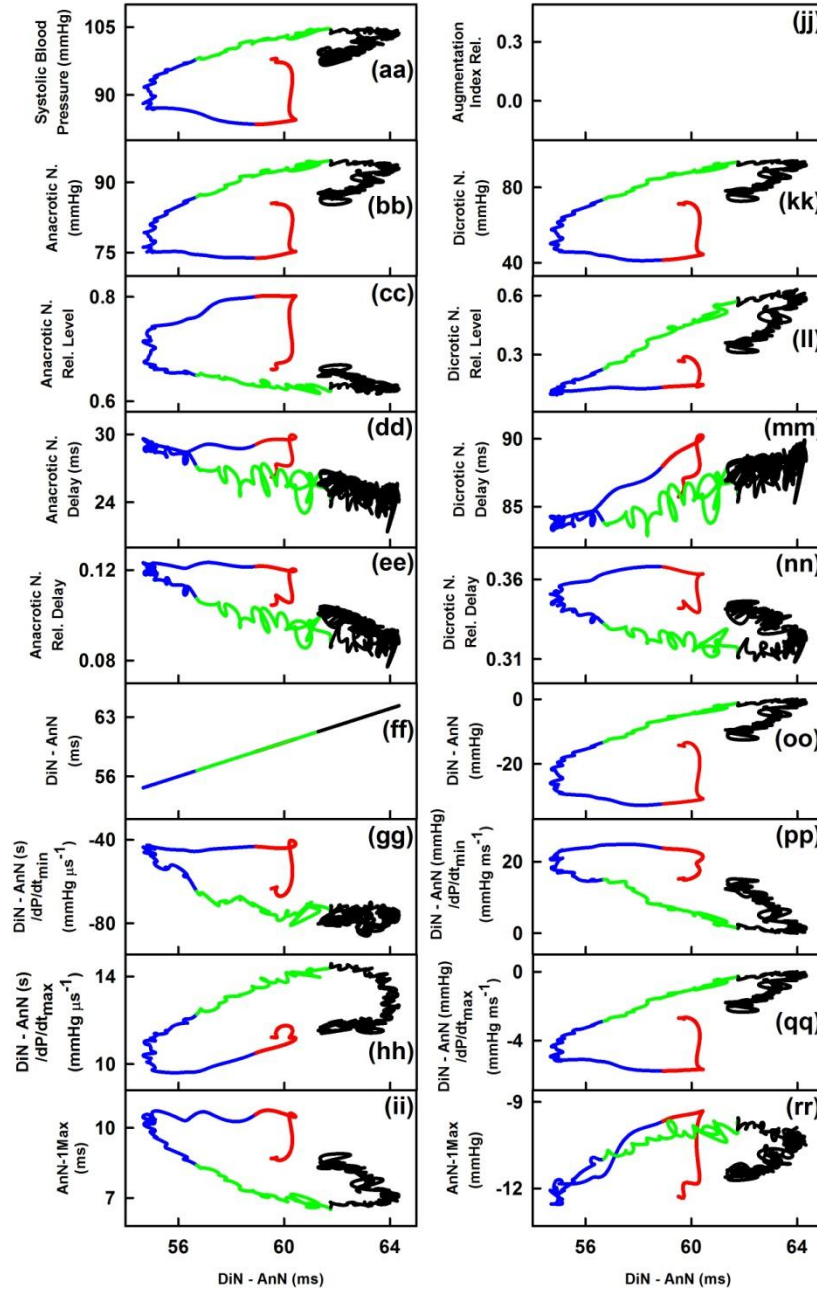

**Figure S3F.** Relationships of HPs to the time interval between dicrotic (DiN) and anacrotic (AnN) notches after the administration of 32 nmol kg<sup>-1</sup> GSNO. The colors and time dependent data correspond to Figure 2. The hysteresis was arbitrary defined as HPs-(DiN-AnN in ms) loop > 3 ms of DiN-AnN.
